# Supplementary material for: Gastrodia elata polysaccharide alleviates Parkinson's disease via inhibiting apoptotic and inflammatory signaling pathways and modulating the gut microbiota
Source: Royal Society of Chemistry journal article supplement (doi:10.1039/d3fo05169b), 2024-01-01

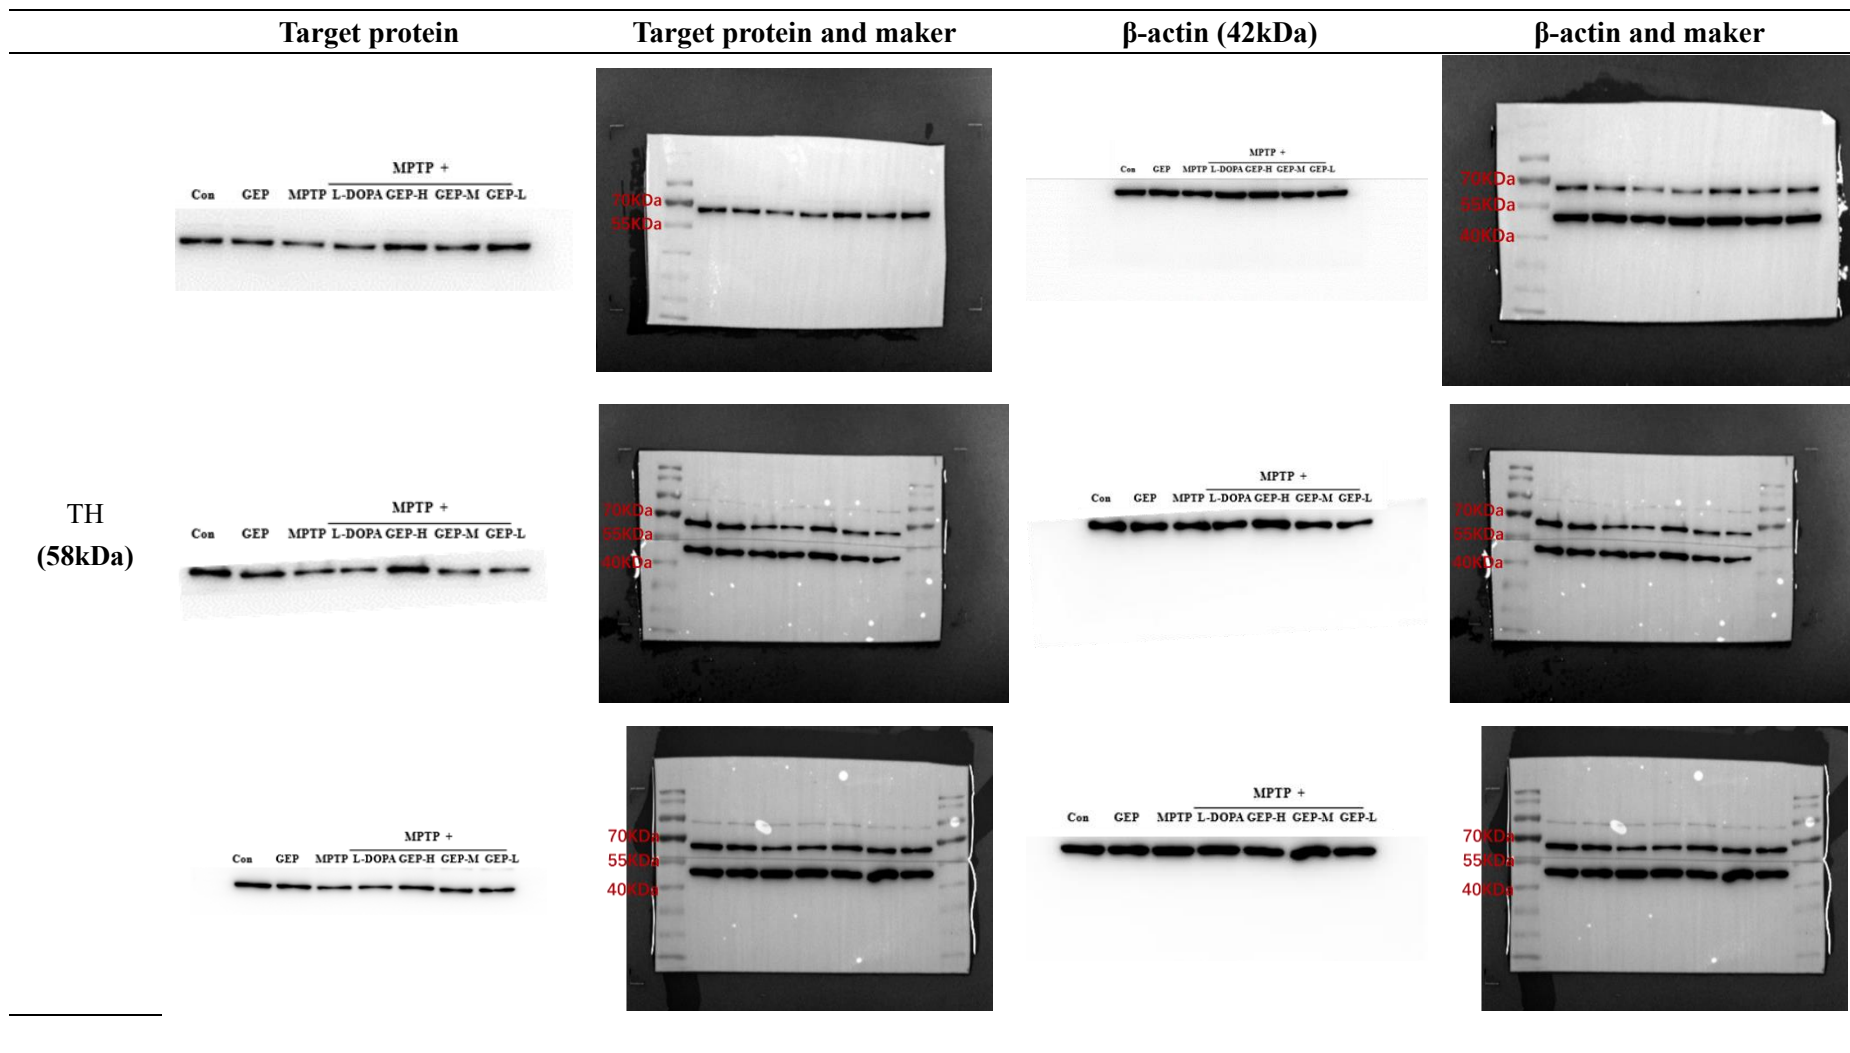

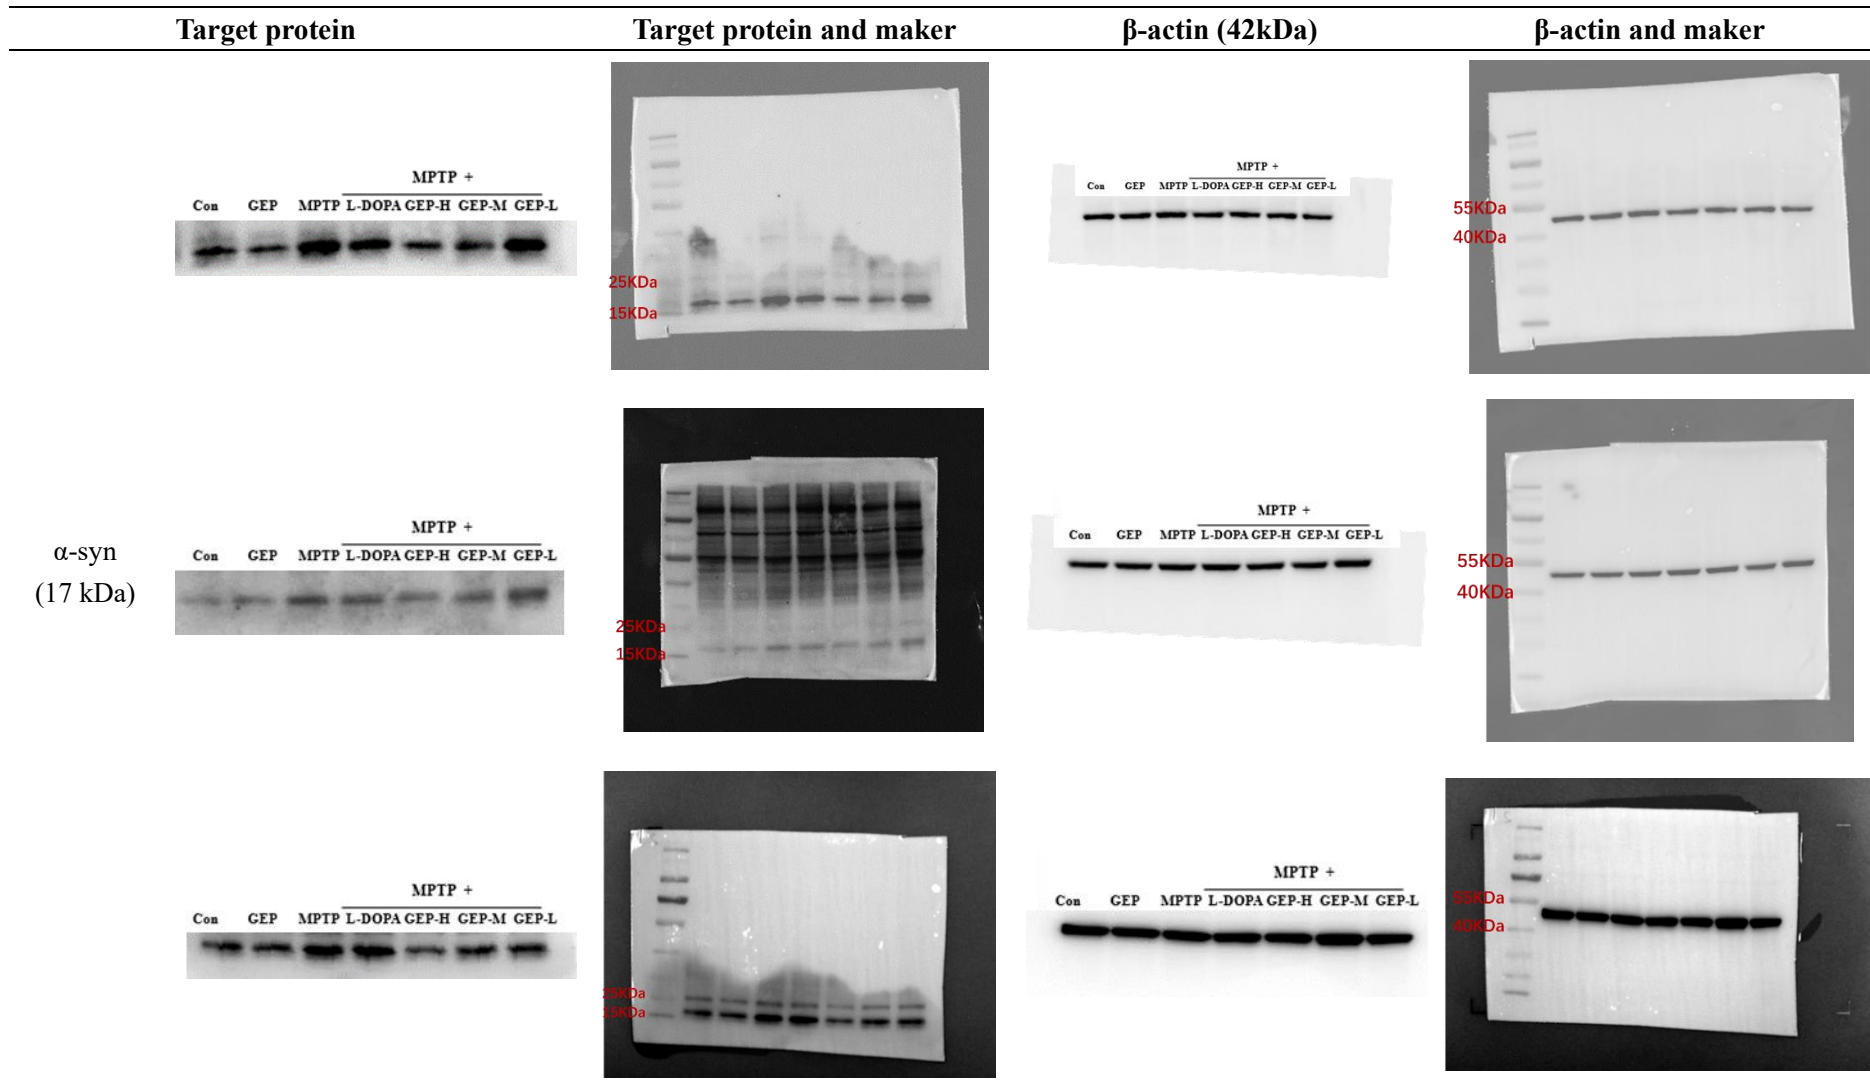

|                   | Target protein | Target protein and maker | $\beta$ -actin (42kDa) | $\beta$ -actin and maker |
|-------------------|----------------|--------------------------|------------------------|--------------------------|
| Bcl-2<br>(26 kDa) |                |                          |                        |                          |
|                   |                |                          |                        |                          |
|                   |                |                          |                        |                          |

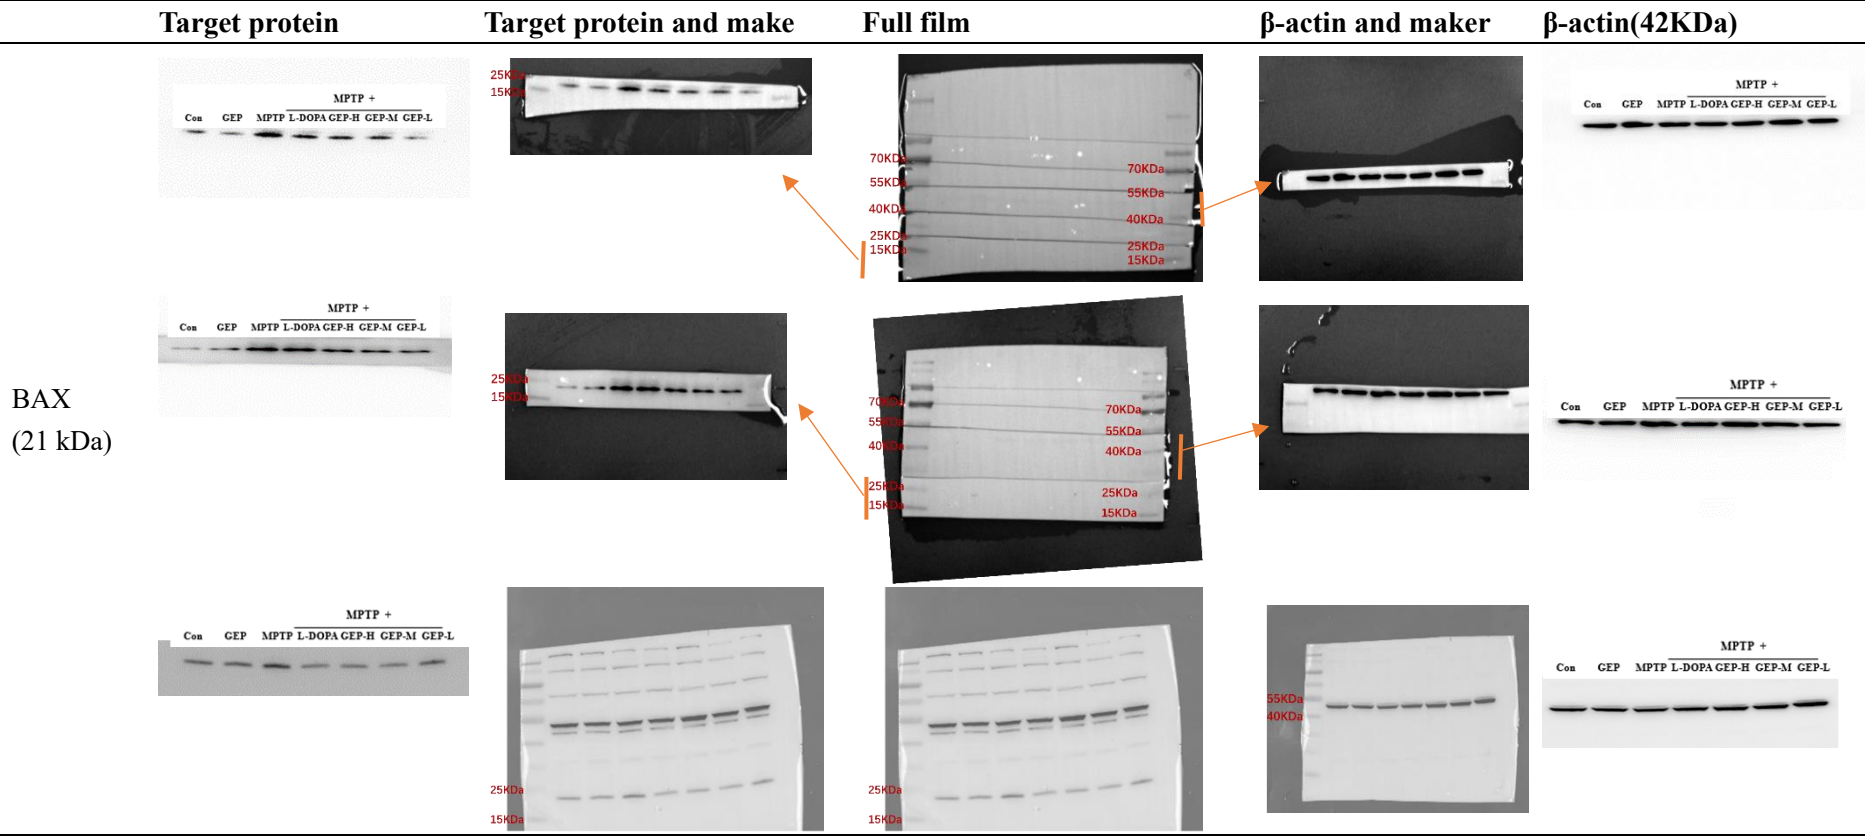

Target protein

Target protein and make

Full film

$\beta$ -actin and maker

$\beta$ -actin(42KDa)

Cleaved-Caspase3  
(17 kDa)

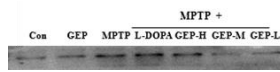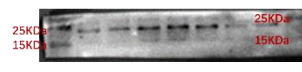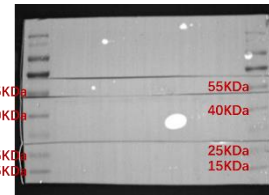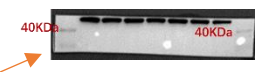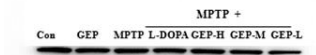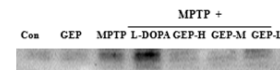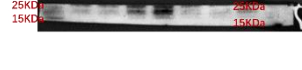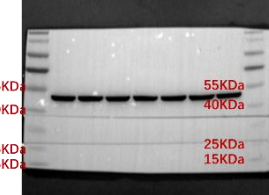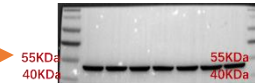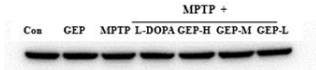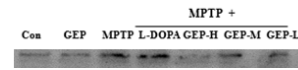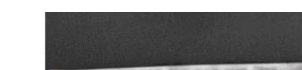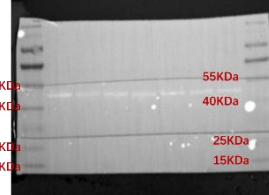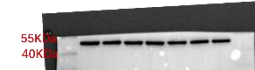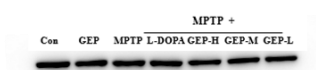

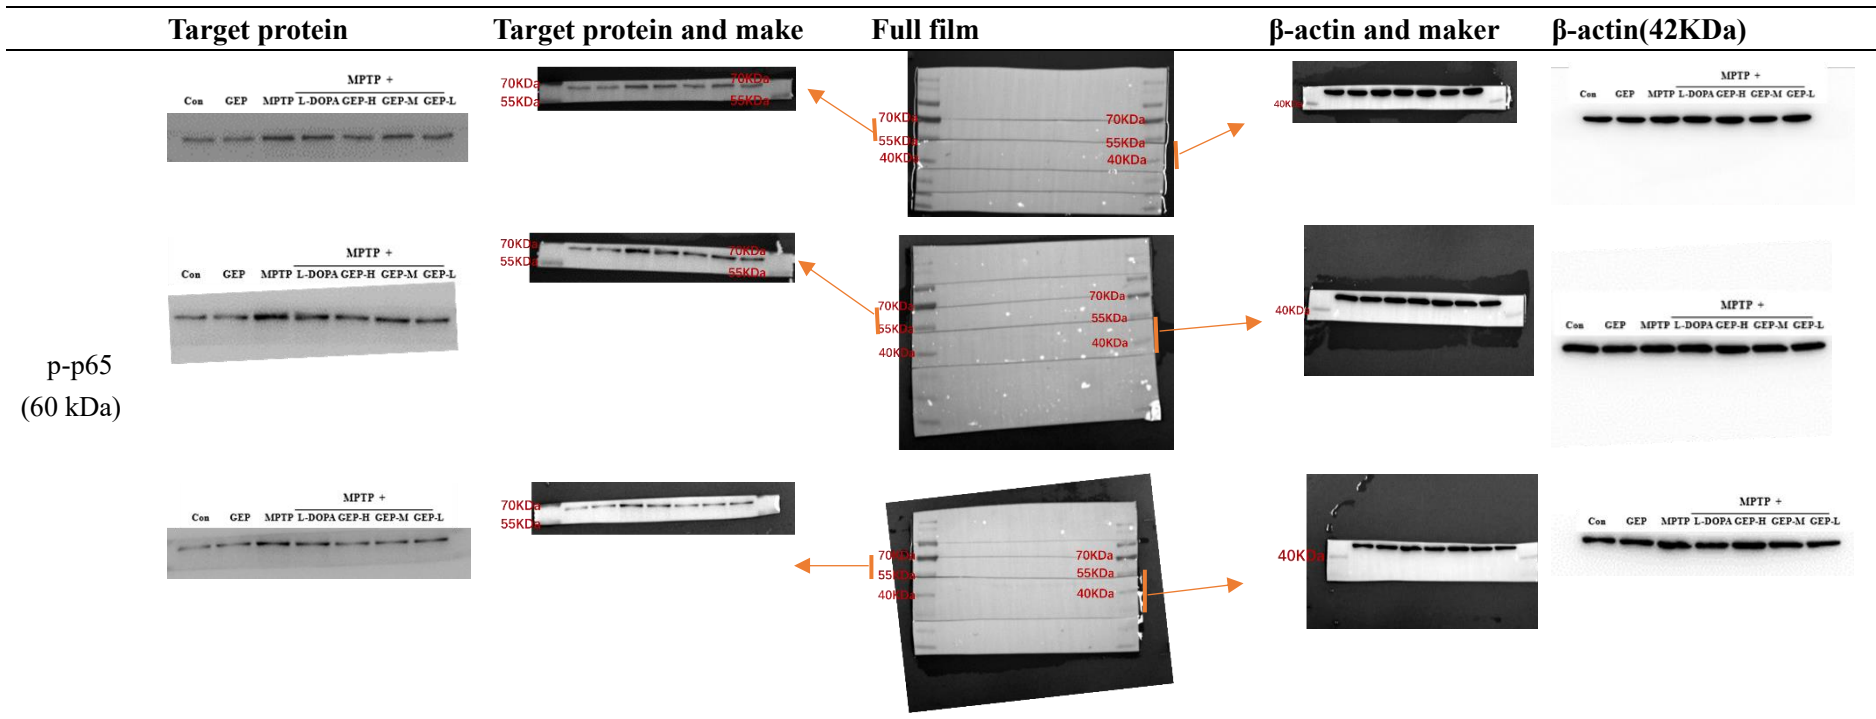

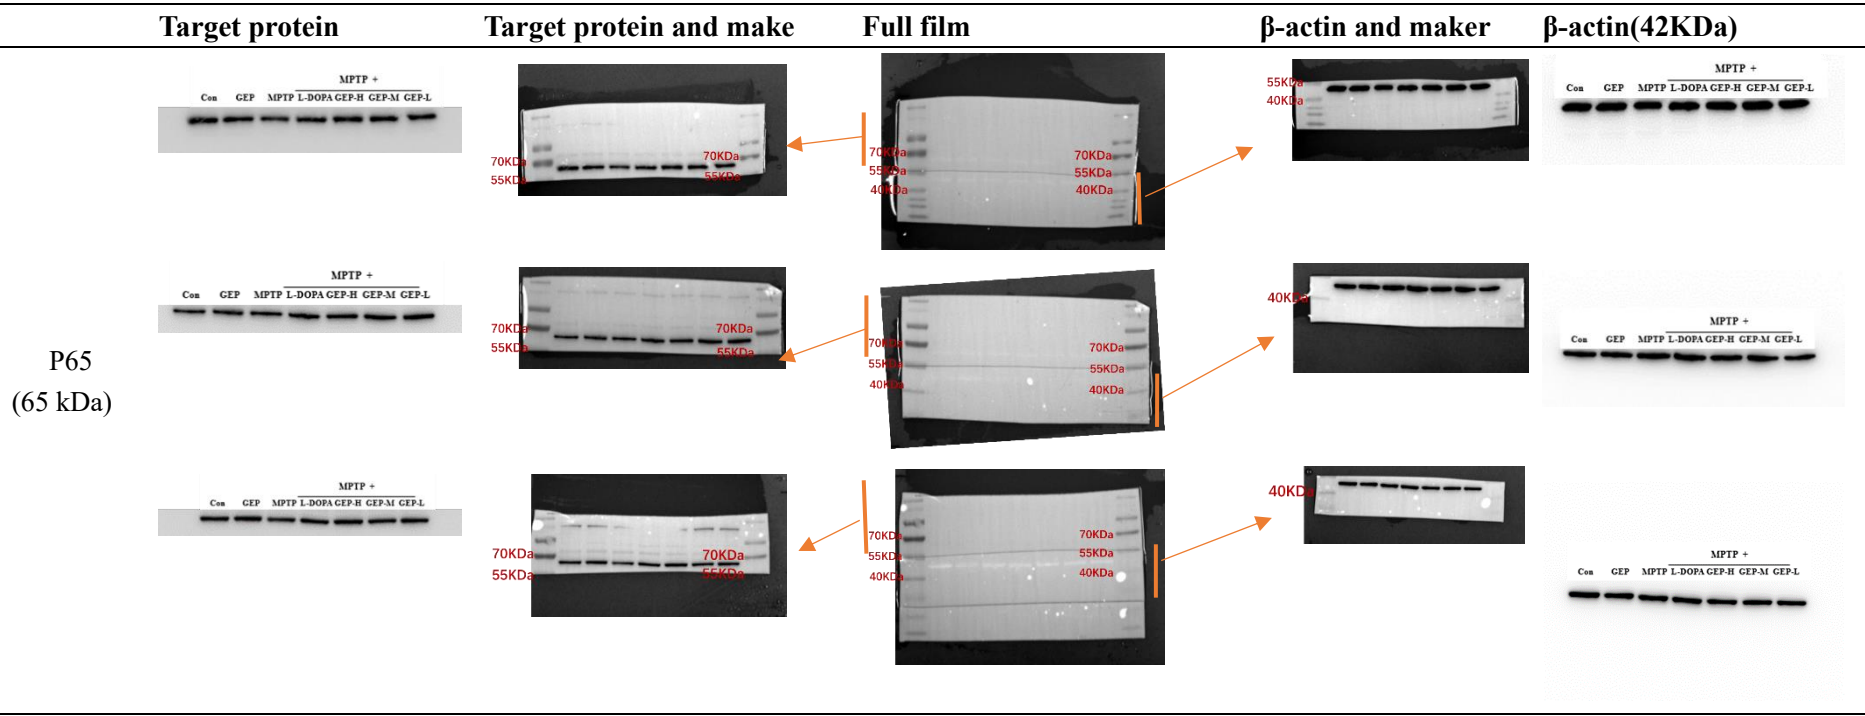

P65  
(65 kDa)



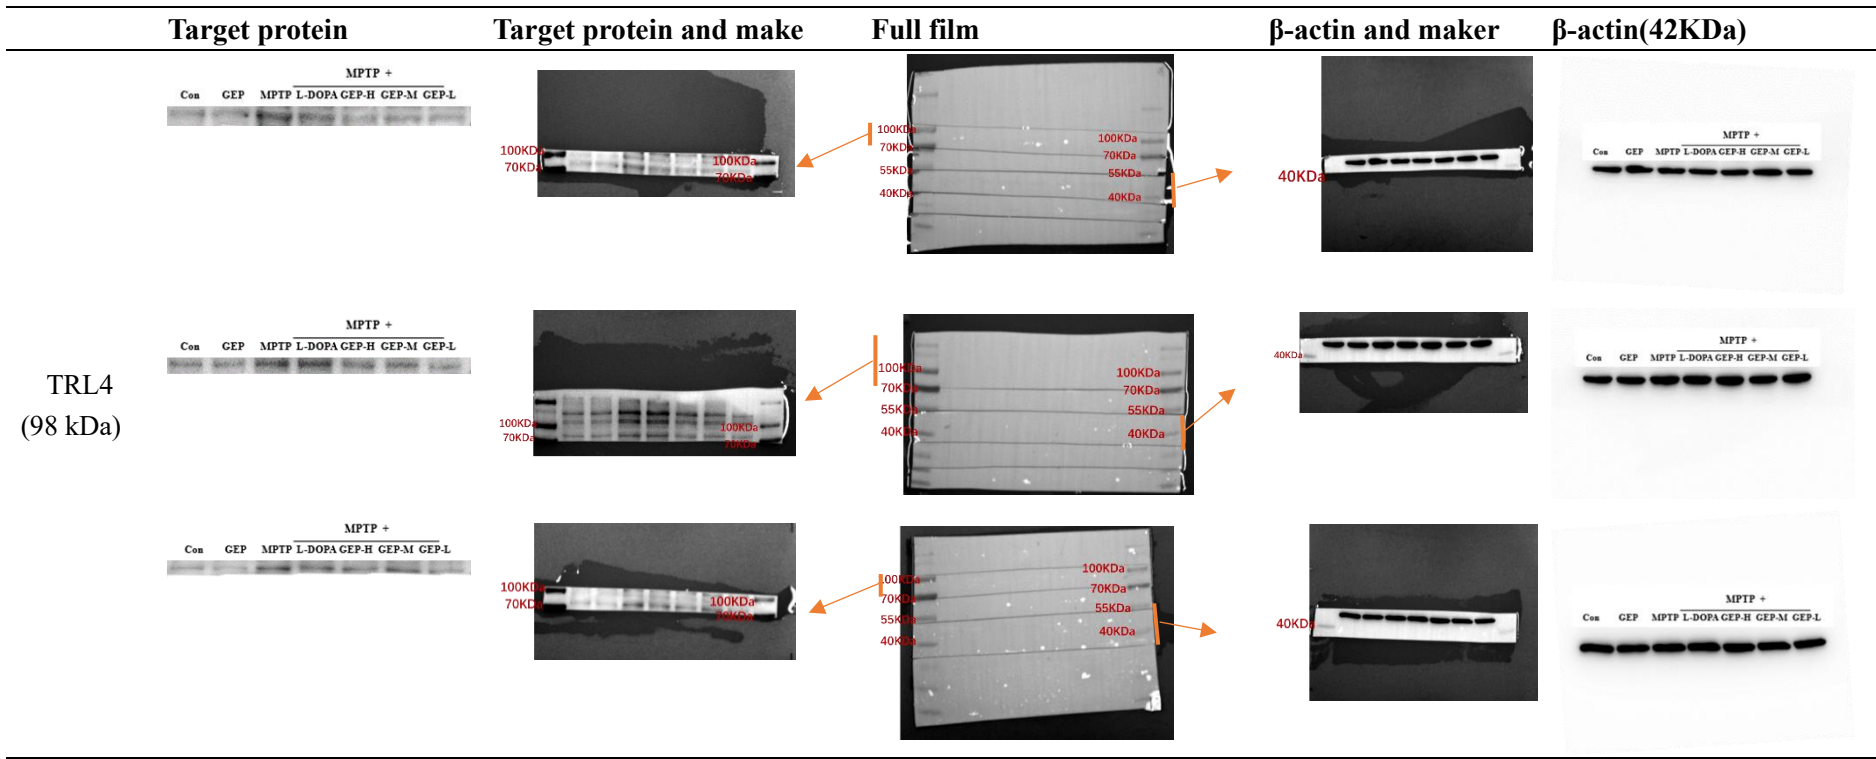



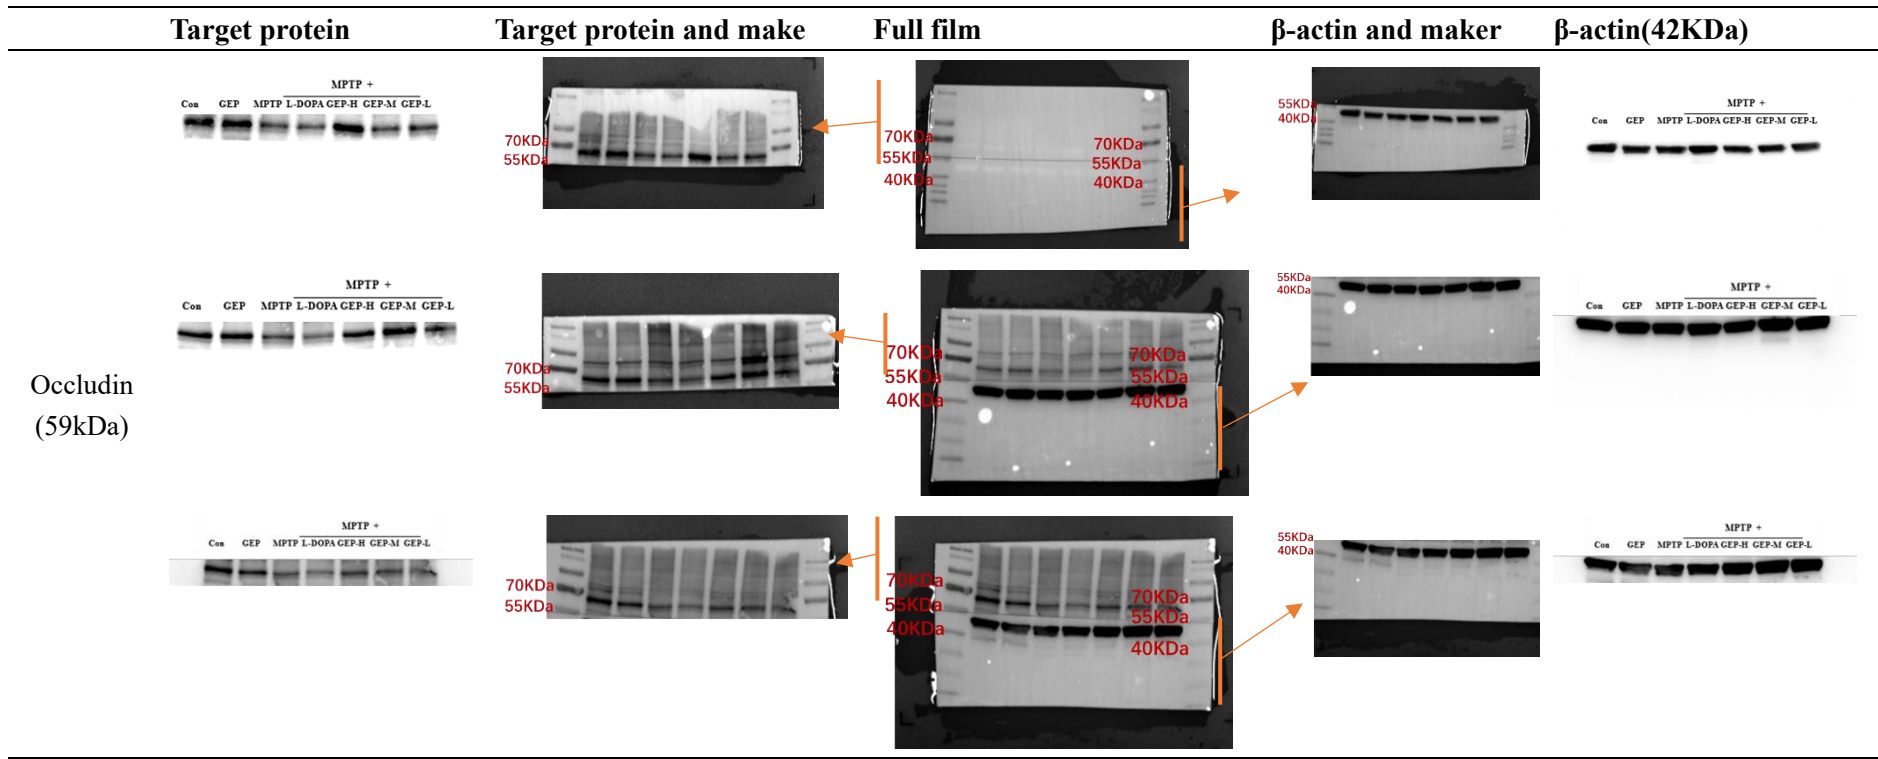

Supplement: d3fo05169b2.pdf [file d3fo05169b2.pdf]
