# Supplementary material for: Gastrodia elata polysaccharide alleviates Parkinson's disease via inhibiting apoptotic and inflammatory signaling pathways and modulating the gut microbiota
Source: Royal Society of Chemistry journal article supplement (doi:10.1039/d3fo05169b), 2024-01-01
Supplement: d3fo05169b1.pdf [file d3fo05169b1.pdf]

According to retention time (RT) and molecular weight of peak (Mp) data in Table S1 and Figure S1, the standard curve is obtained, as  $LgMp = 0.0466 t_R^2 - 1.3722 t_R + 11.616$ ,  $R^2 = 0.9996$ .

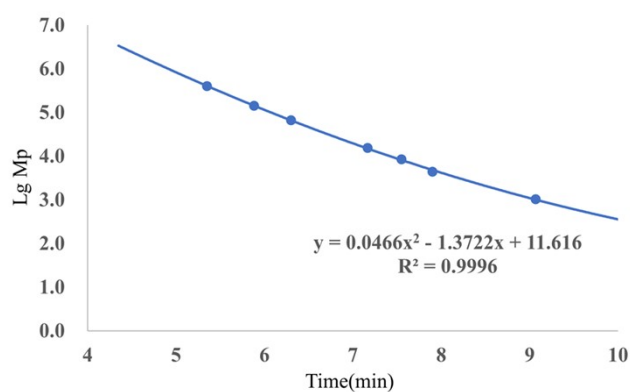

Figure S1. The standard curve of LgMp and time.

Table S1 The RT, Mp and Lg Mp of dextran standards.

| RT (min) | Mp (Da) | LgMp  |
|----------|---------|-------|
| 5.350    | 401300  | 5.603 |
| 5.883    | 143000  | 5.155 |
| 6.300    | 66700   | 4.824 |
| 7.167    | 15400   | 4.188 |
| 7.550    | 8500    | 3.929 |
| 7.900    | 4410    | 3.644 |
| 9.067    | 1030    | 3.013 |

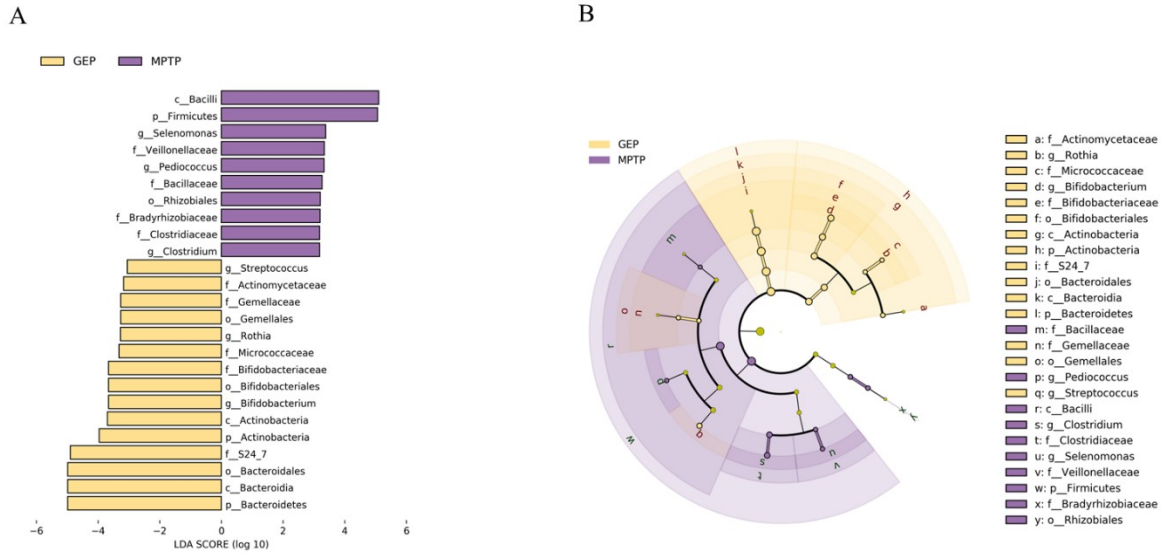

Figure S2. (A)The LDA effect value histogram of marker species in GEP and MPTP groups. (B) The difference taxa display diagram of taxonomic rank tree.

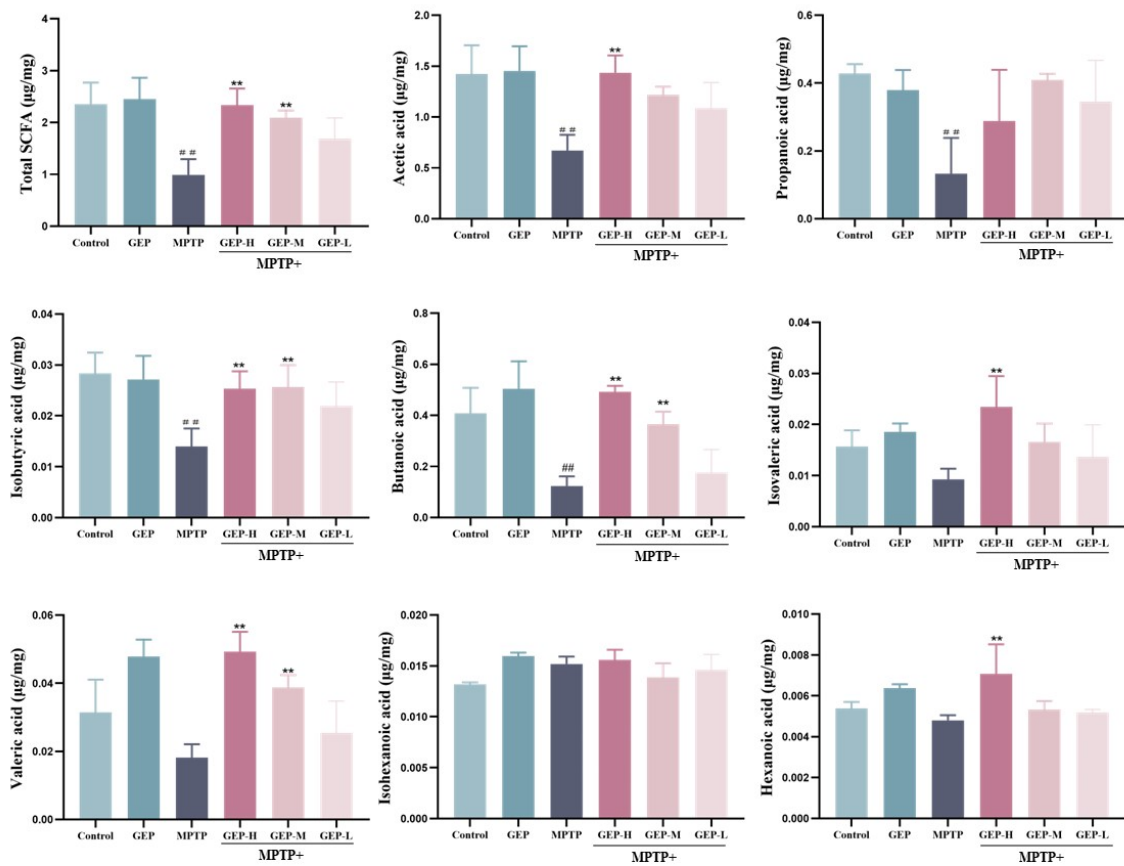

Figure S3. The content of SCFAs. Error bars indicate SEM, ##  $p < 0.05$  vs. Con group, \*\*  $p < 0.05$  vs. MPTP group.

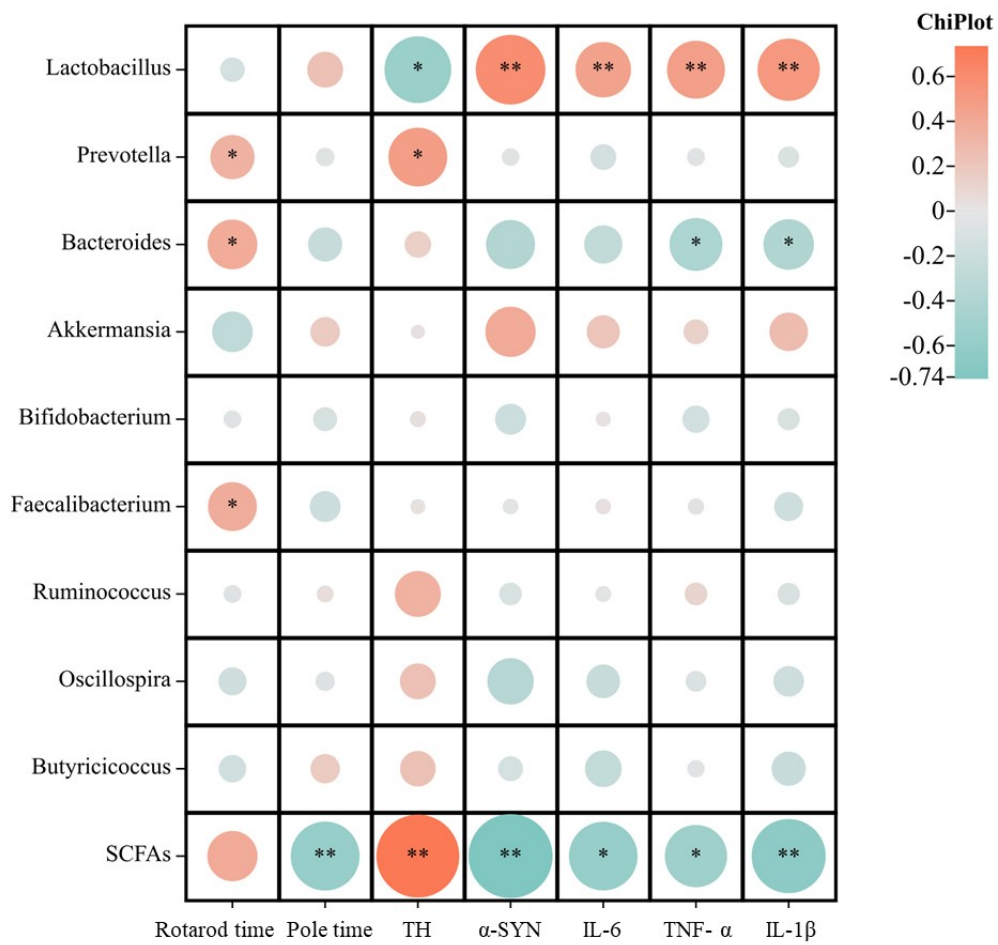

Figure S4. Correlation analysis of relative abundance of key bacteria and other parameters. The rValue was presented by circles with varied color depth (\* $p < 0.05$ , \*\* $p < 0.005$ ).
